# Supplementary material for: Adenosine Deaminase Polymorphism Affects Sleep EEG Spectral Power in a Large Epidemiological Sample
Source: PLoS One. 2012 Aug 29;7(8):e44154. doi: 10.1371/journal.pone.0044154 (PMC3430663; doi:10.1371/journal.pone.0044154)
Supplement: Table S1 — Electroencephalogram spectral power for all derivations, bandwidths, and sleep stages between ADA G22A genotype groups in the EPISONO epidemiological sample. Independent samples t-tests were performed and the whole sample was included. (XLS) [file pone.0044154.s001.xls]

## Sheet: Plan1
	EEG spectral power				ADA genotype groups				t	p
	Derivation	Sleep stage	Bandwidth		N	GG	N	GA+AA
	O2A1	1	Delta		670	15,019127 ± 2,5839688	69	17,654714 ± 2,5706026	-8.07117	2.8291e-15
			Theta		670	4,31914 ± 1,2057137	69	4,672625 ± 1,1079462	-2.33564	0.0197772
			Alpha1		670	4,0567 ± 1,878705	69	4,015407 ± 1,6030332	0.176064	0.860292
			Alpha2		670	2,107547 ± 0,929482	69	2,145645 ± 0,7237283	-0.330247	0.741307
			Beta1		670	0,95483 ± 0,3784246	69	1,050881 ± 0,3718597	-2.01072	0.044719
			Beta2		670	0,407101 ± 0,2009546	69	0,433199 ± 0,196286	-1.02934	0.303659
			Gamma		670	0,003038 ± 0,0117435	69	0,001648 ± 0,0011441	0.982506	0.326173
		2	Delta		727	17,600135 ± 2,4488379	72	17,394987 ± 2,0812073	0.686603	0.492533
			Theta		727	4,163117 ± 1,1168269	72	5,716758 ± 1,3756141	-9.28515	2.28137e-14
			Alpha1		727	2,543083 ± 0,9949243	72	2,657258 ± 0,9968469	-0.928687	0.353333
			Alpha2		727	1,403909 ± 0,5760946	72	1,479715 ± 0,6300481	-1.05586	0.29135
			Beta1		727	0,83181 ± 0,3917859	72	0,809286 ± 0,4004282	0.464394	0.642493
			Beta2		727	0,178405 ± 0,129869	72	0,185115 ± 0,0872069	-0.42886	0.668141
			Gamma		725	0,001924 ± 0,007485	72	0,001071 ± 0,0008144	0.965766	0.334455
		3+4	Delta		713	21,017266 ± 2,321571	72	24,951735 ± 2,7077722	-13.4865	1.99779e-37
			Theta		713	2,938482 ± 1,0782193	72	3,103349 ± 1,0634866	-1.23804	0.216071
			Alpha1		713	1,314078 ± 0,7203408	72	1,424551 ± 0,8332819	-1.22163	0.222216
			Alpha2		713	0,710027 ± 0,4946174	72	0,793103 ± 0,6143042	-1.32604	0.185214
			Beta1		713	0,386667 ± 0,2398621	72	0,3993 ± 0,286357	-0.417944	0.676103
			Beta2		713	0,078272 ± 0,0891023	72	0,097 ± 0,1334958	-1.16446	0.247807
			Gamma		713	0,001342 ± 0,0100715	72	0,000671 ± 0,000949	0.565185	0.57211
		REM	Delta		722	16,752774 ± 2,6229978	71	16,857413 ± 2,7557941	-0.319279	0.7496
			Theta		722	4,01898 ± 1,1283418	71	4,404438 ± 1,2186441	-2.72661	0.0065406
			Alpha1		722	3,318664 ± 1,3546662	71	3,008755 ± 1,2820454	1.8479	0.0649901
			Alpha2		722	1,750087 ± 0,7008399	71	1,720566 ± 0,8449456	0.33207	0.739924
			Beta1		722	0,83712 ± 0,3694117	71	0,863617 ± 0,4235182	-0.568828	0.569635
			Beta2		722	0,300121 ± 0,1942234	71	0,304754 ± 0,1825971	-0.192742	0.84721
			Gamma		721	0,001654 ± 0,0062842	71	0,001049 ± 0,0015079	0.807471	0.419638
	O1A2	1	Delta		670	14,671297 ± 2,6080455	69	14,521846 ± 2,2334018	0.458914	0.646431
			Theta		669	4,42295 ± 1,173568	69	4,569016 ± 1,131312	-0.987581	0.323682
			Alpha1		669	4,060554 ± 1,8323716	69	3,958496 ± 1,7228678	0.442875	0.657986
			Alpha2		669	2,172283 ± 0,9331965	69	2,157228 ± 0,7870321	0.129327	0.897135
			Beta1		669	1,045962 ± 0,4222718	69	1,092174 ± 0,4327468	-0.863504	0.388142
			Beta2		669	0,436106 ± 0,2120519	69	0,46913 ± 0,2153946	-1.22991	0.219125
			Gamma		669	0,003939 ± 0,015772	69	0,004926 ± 0,0194297	-0.483315	0.629016
		2	Delta		727	17,485916 ± 2,4846888	72	17,484776 ± 2,0033555	0.00377187	0.996991
			Theta		727	4,077951 ± 1,0832656	72	4,258054 ± 0,9613898	-1.35861	0.174655
			Alpha1		727	2,496038 ± 0,9721785	72	2,503228 ± 0,984153	-0.0597899	0.952338
			Alpha2		727	1,440368 ± 0,5813635	72	1,433374 ± 0,5498006	0.0978448	0.92208
			Beta1		726	0,904486 ± 0,4196637	72	0,846919 ± 0,4140654	1.11152	0.266682
			Beta2		726	0,198734 ± 0,1149957	72	0,210261 ± 0,1171433	-0.809939	0.418217
			Gamma		724	0,004022 ± 0,0143407	72	0,004182 ± 0,0130512	-0.0908226	0.927656
		3+4	Delta		713	20,787616 ± 2,5143907	72	20,686475 ± 2,0464721	0.330386	0.741197
			Theta		713	2,942705 ± 1,0475806	72	3,113624 ± 0,9300959	-1.33225	0.183165
			Alpha1		713	1,361826 ± 0,7479257	72	1,444396 ± 0,9175224	-0.873012	0.382924
			Alpha2		713	0,760667 ± 0,5201547	72	0,810574 ± 0,6129935	-0.762563	0.445953
			Beta1		712	0,441356 ± 0,2746042	72	0,429608 ± 0,2730822	0.3461	0.729361
			Beta2		712	0,093343 ± 0,0941889	72	0,106249 ± 0,1184149	-1.07984	0.280547
			Gamma		712	0,003005 ± 0,021808	72	0,001993 ± 0,003951	0.392727	0.694628
		REM	Delta		722	16,296774 ± 2,6682005	71	16,495982 ± 2,7344781	-0.59894	0.549384
			Theta		721	4,173302 ± 1,1110512	71	4,20871 ± 1,0423431	-0.257582	0.796797
			Alpha1		721	3,326951 ± 1,2861816	71	3,047808 ± 1,3462782	1.7375	0.0826879
			Alpha2		721	1,857016 ± 0,7268678	71	1,761313 ± 0,7943165	1.04955	0.294246
			Beta1		721	0,93416 ± 0,4101807	71	0,919207 ± 0,4224903	0.292288	0.770143
			Beta2		721	0,332185 ± 0,1895958	71	0,326966 ± 0,1757888	0.22267	0.82385
			Gamma		720	0,002561 ± 0,0099566	71	0,003872 ± 0,0191461	-0.569363	0.57084
	C3A2	1	Delta		670	15,686893 ± 2,5880469	69	15,740964 ± 2,4357026	-0.166123	0.868106
			Theta		670	3,853727 ± 1,0829452	69	3,840696 ± 1,0631091	0.0953348	0.924075
			Alpha1		670	3,28983 ± 1,6007525	69	3,263988 ± 1,6315951	0.127456	0.898614
			Alpha2		670	1,819003 ± 0,7824729	69	1,86258 ± 0,8107285	-0.438988	0.660799
			Beta1		670	1,030794 ± 0,4309767	69	1,077674 ± 0,4098946	-0.864161	0.387781
			Beta2		670	0,506832 ± 0,2888674	69	0,501443 ± 0,2245101	0.15031	0.880561
			Gamma		670	0,004538 ± 0,0188385	69	0,004326 ± 0,0105499	0.0917615	0.926912
		2	Delta		727	18,710269 ± 2,4939965	72	18,713836 ± 2,0146482	-0.0117608	0.990619
			Theta		727	3,126788 ± 0,7863598	72	5,163274 ± 1,2106831	-13.9839	7.71225e-23
			Alpha1		727	2,126527 ± 0,937825	72	2,31679 ± 1,2941083	-1.2163	0.227514
			Alpha2		727	1,545944 ± 0,7045065	72	1,631771 ± 0,7550027	-0.979586	0.327588
			Beta1		727	0,835618 ± 0,4069429	72	0,810474 ± 0,334746	0.507478	0.61196
			Beta2		727	0,180812 ± 0,193506	72	0,16546 ± 0,0737193	0.668113	0.504255
			Gamma		726	0,003738 ± 0,02839	72	0,002089 ± 0,0032164	0.492185	0.622724
		3+4	Delta		713	21,492666 ± 2,3517518	72	21,496686 ± 1,8788178	-0.0140549	0.98879
			Theta		713	2,216123 ± 0,7098855	72	2,292607 ± 0,707988	-0.87149	0.383754
			Alpha1		713	1,339682 ± 0,8110556	72	1,495956 ± 1,051343	-1.51221	0.130884
			Alpha2		713	0,994701 ± 0,6842952	72	1,08106 ± 0,7823893	-1.00664	0.314419
			Beta1		713	0,383173 ± 0,2428106	72	0,376233 ± 0,2146212	0.233449	0.815474
			Beta2		713	0,084562 ± 0,229565	72	0,07111 ± 0,0705175	0.494617	0.62101
			Gamma		713	0,002999 ± 0,0293883	72	0,001065 ± 0,0014545	0.557981	0.577017
		REM	Delta		722	17,441782 ± 2,559957	71	17,739821 ± 2,5975229	-0.934835	0.350159
			Theta		722	3,957043 ± 1,0414501	71	3,787035 ± 0,9938069	1.3177	0.187987
			Alpha1		722	2,439084 ± 0,9920033	71	2,350168 ± 1,2097735	0.705611	0.480638
			Alpha2		722	1,338137 ± 0,5894207	71	1,350292 ± 0,6578824	-0.164028	0.869751
			Beta1		722	0,771181 ± 0,3763261	71	0,779514 ± 0,3806188	-0.177844	0.858891
			Beta2		722	0,363819 ± 0,2752699	71	0,33491 ± 0,1966514	0.86329	0.38824
			Gamma		722	0,003946 ± 0,0330415	71	0,002286 ± 0,0049877	0.422673	0.672649
	C4A1	1	Delta		670	16,028994 ± 2,6553493	69	16,076322 ± 2,6693107	-0.140904	0.887984
			Theta		669	3,647967 ± 0,9944781	69	3,678274 ± 1,0236503	-0.240365	0.810114
			Alpha1		669	3,138198 ± 1,5598295	69	3,222948 ± 1,6811558	-0.426534	0.669843
			Alpha2		669	1,744907 ± 0,7543454	69	1,806226 ± 0,7919158	-0.639873	0.522454
			Beta1		669	1,001902 ± 0,4141229	69	1,041959 ± 0,3749125	-0.771455	0.440685
			Beta2		669	0,504658 ± 0,368168	69	0,482158 ± 0,2138426	0.498838	0.618043
			Gamma		668	0,007804 ± 0,0235516	69	0,007425 ± 0,0224926	0.12807	0.898128
		2	Delta		727	18,884073 ± 2,7140894	72	18,837625 ± 2,4040519	0.139865	0.888802
			Theta		727	2,952936 ± 0,7960955	72	3,036558 ± 0,7598466	-0.853586	0.393591
			Alpha1		727	2,031176 ± 0,9229917	72	2,291807 ± 1,2627738	-1.70675	0.0918116
			Alpha2		727	1,431648 ± 0,6556202	72	1,540533 ± 0,8048578	-1.31487	0.188933
			Beta1		726	0,824887 ± 0,4077353	72	0,806368 ± 0,3563451	0.371523	0.710347
			Beta2		726	0,204908 ± 0,3984368	72	0,184135 ± 0,1586699	0.438755	0.660958
			Gamma		725	0,006581 ± 0,01873	72	0,006678 ± 0,0215849	-0.0411139	0.967215
		3+4	Delta		713	21,624575 ± 2,7501254	72	21,600893 ± 2,4455656	0.0703082	0.943966
			Theta		713	2,065616 ± 0,7512317	72	2,158972 ± 0,7674614	-1.00297	0.316187
			Alpha1		713	1,261143 ± 0,7985144	72	1,425003 ± 0,938843	-1.63142	0.103204
			Alpha2		713	0,899877 ± 0,6383318	72	1,019718 ± 0,9132523	-1.08699	0.280384
			Beta1		712	0,387523 ± 0,2885732	72	0,383662 ± 0,2834942	0.108342	0.913752
			Beta2		712	0,102998 ± 0,3694167	72	0,094539 ± 0,1572605	0.192447	0.847442
			Gamma		712	0,004777 ± 0,0195686	72	0,005138 ± 0,0221202	-0.147081	0.883106
		REM	Delta		722	17,669094 ± 2,7077852	71	17,872379 ± 2,7334743	-0.603095	0.546618
			Theta		721	3,743228 ± 0,9971536	71	4,252459 ± 1,1131436	-4.06164	5.35882e-05
			Alpha1		721	2,333583 ± 0,9757973	71	2,299861 ± 1,244444	0.270437	0.786895
			Alpha2		721	1,291656 ± 0,5783103	71	1,335475 ± 0,6204348	-0.605121	0.545273
			Beta1		721	0,759759 ± 0,3819158	71	0,789024 ± 0,3958441	-0.614026	0.539375
			Beta2		721	0,382554 ± 0,4529701	71	0,350944 ± 0,2381857	0.579936	0.562123
			Gamma		720	0,005012 ± 0,0187582	71	0,005811 ± 0,0220478	-0.336966	0.736232
